# Supplementary material for: Temporal Efficacy of a Sulforaphane-Based Broccoli Sprout Diet in Prevention of Breast Cancer through Modulation of Epigenetic Mechanisms
Source: Oxford University Press journal article supplement (doi:10.1158/1940-6207.capr-17-0423), 2018-05-15
Supplement: 19406207capr170423-sup-194133_2_supp_4727650_p82hly.xlsx [file 19406207capr170423-sup-194133_2_supp_4727650_p82hly.xlsx]

## Sheet: RNA-Seq data
Gene ID	t-test: control vs broccoli sprouts original values - Fold change	t-test: control vs broccoli sprouts original values - P-value
Rbbp6	2.6571	5.96865e-05
Golim4	4.38048	0.0277209
Fam199x	2.81266	0.000429319
Cep57l1	2.30871	0.000957059
Il1rap	5.94896	0.0387892
Ppm1k	3.37165	0.000567312
Rsf1	3.1514	0.000478105
Ssr3	2.36634	0.00179413
Rsad2	5.57245	0.0242224
Zfp420	3.02025	0.00194357
Mip	1.79769e+308	0.00223721
Eftud1	2.56112	0.00231385
Hmgn5	1.93984	0.00232671
Kcne4	1.79769e+308	0.0348394
Ppp4r1l-ps	2.67121	0.00240999
Phf21a	3.26693	0.000349931
Gm12056	1.79769e+308	0.00242686
Fbxo17	2.6701	0.00246248
Hist1h2ab	-12.0676	0.00252312
Lims1	2.74792	0.00250828
Cwf19l2	3.01784	0.00136415
Eif2ak4	2.36097	0.00263964
Gm26690	2.854	0.00235449
Zfp58	2.59172	0.00422123
Zfp354c	5.07049	0.0186754
2810403A07Rik	6.44328	0.0150924
Pfkp	2.56507	0.00539814
4933421O10Rik	3.83387	0.00301943
Ube2d1	2.04383	0.00290276
Hiat1	3.28263	0.00355696
Tasp1	1.84904	0.000500716
F2r	2.78629	0.00365341
Aspm	2.65384	0.00381764
Papss1	3.02429	0.00393775
Exd1	5.47259	0.0489308
Clk2	2.75366	0.00434396
Zfp606	3.34589	0.00434577
Man2a2	3.4342	0.00444174
Trp53bp1	2.29361	0.00454652
Setdb1	3.21099	0.0046173
Acpl2	2.06769	0.00555137
Zbtb6	2.62103	0.00468797
Ankzf1	2.66253	0.0326454
Zfp949	5.90875	0.00293031
Xab2	1.54133	0.0100688
Apool	2.05016	0.0158046
Whamm	3.715	0.00497531
Map7	2.74599	0.00212796
Fbxo30	2.34171	0.00508565
Rpf1	2.46081	0.00508817
Anp32e	2.01621	0.00521196
Mrps2	2.57721	0.0041391
Sec22b	1.85169	0.0052546
Trim68	3.43913	0.00532458
Parpbp	2.40773	0.00271438
Tnrc6a	2.5004	0.00345796
Ddx20	2.75611	0.00460471
Vcam1	6.58696	0.00250886
Ccdc9	1.5041	0.00112941
Hist1h2ap	-8.13436	0.0070393
Dcun1d1	3.04504	0.00621923
Rad52	2.89635	0.00116859
Syngr3	3.92727	0.00155814
Twsg1	2.34821	0.0405956
1110059G10Rik	1.73287	0.00122339
Zfp72	1.79769e+308	0.0186867
Selt	2.4871	0.00651117
Cox11	2.05077	0.0262442
Cstad	1.79769e+308	0.0259353
Trps1	2.77577	0.00208433
Agtr1a	1.79769e+308	0.00681152
Gm2895	1.79769e+308	0.00681152
Zfp811	1.79769e+308	0.00681152
Ttll3	4.42541	0.00137132
Zfp668	2.04901	0.00688484
Hist2h2be	3.02128	0.0237283
Tet2	4.11383	0.00415785
March7	2.70435	0.00547186
Abcb9	2.31364	0.00693345
Casc5	3.22835	0.00286038
Prom2	3.19696	0.00734429
Hltf	3.88787	0.00189704
Rictor	2.58644	0.00531371
Polq	2.18289	0.00761675
Usp35	2.94179	0.00169457
Zbtb24	2.71081	0.00193134
P2rx5	1.93835	0.0064874
Zfp688	1.56203	0.00790422
Gmps	1.66643	0.00625394
Mdm1	2.74825	0.00770274
Errfi1	3.94007	0.00300046
Sh2b1	4.12094	0.00236394
Rif1	2.73268	0.00796829
Zranb1	3.70826	0.00202725
Fnbp4	4.49928	0.00567693
Pecam1	1.60698	0.00176014
Azi1	2.20683	0.00766941
Ric8b	4.41545	0.0450099
Pofut2	2.44256	0.00211986
Mterfd2	2.00378	0.00891657
Eif2a	2.43136	0.0025855
Sec62	2.3914	0.00905164
Ammecr1	2.82873	0.0058607
Clk1	3.74371	0.00502597
Uimc1	3.18697	0.00756102
Elovl5	2.94068	0.034917
Wsb1	3.09858	0.00565568
Slco2a1	2.744	0.00691123
Zfp334	2.79734	0.00760675
Tcf3	2.46071	0.0470079
Cited2	2.9598	0.00795132
D930016D06Rik	5.3593	0.0333486
Atf2	2.75028	0.00938655
Fuca2	2.40868	0.00709179
Slc25a36	3.09597	0.0101267
Dido1	2.61802	0.00918967
Tial1	2.76434	0.042822
Irf7	7.32254	0.00242138
Cers2	3.32929	0.0100715
Secisbp2l	2.85203	0.0108437
Zfp932	2.13054	0.0106416
Itsn2	3.39587	0.0109156
Nudt6	2.99814	0.0110658
Phrf1	2.74409	0.00887975
Trim33	4.614	0.0111964
Plk1s1	1.92979	0.00849269
Fam115a	3.92368	0.00669844
Isg20l2	2.87549	0.0112353
Atp8b1	3.6774	0.00812563
Arrdc3	3.93501	0.00364899
Ccdc55	1.70773	0.0116411
Ankrd27	4.27574	0.0116442
Arid4b	3.17692	0.011088
Mgst1	4.95946	0.0116862
Tbc1d32	3.1705	0.011546
Six5	2.39748	0.0117984
Dmwd	2.30626	0.0104566
Zscan22	4.25781	0.0118312
Fermt2	2.94851	0.00303917
4933439C10Rik	3.87461	0.00322146
Zfp106	2.41751	0.00723954
Rnf13	2.49711	0.0119088
Pex2	2.37977	0.0121956
Plrg1	1.95954	0.0116733
4833420G17Rik	2.60877	0.00315829
Dnajc7	1.96111	0.00330605
Alg5	2.11159	0.0109843
Zfp715	3.4392	0.00976611
Zfp408	3.32004	0.0115701
Tab2	2.26157	0.00894644
Proz	1.79769e+308	0.00588965
Cdc40	3.98949	0.00921457
Traf3ip2	3.53863	0.0129604
Rbm39	3.08868	0.017696
Vprbp	2.22932	0.0129939
Brf1	1.37701	0.0131861
C230081A13Rik	3.02249	0.0131987
Trmt1l	2.33464	0.00593482
Kbtbd7	3.40828	0.00388722
Impa1	2.25924	0.0134468
Ifngr1	2.4515	0.00745612
Cat	3.30379	0.00375297
Ccnt2	2.93865	0.0136441
Atrip	1.67992	0.00992342
Mex3b	2.37552	0.004359
Phkg2	3.37111	0.0248153
Fbxw7	2.46253	0.0136766
Nipa2	2.63533	0.00365162
Cep110	2.87313	0.0109929
Npr3	3.24911	0.0133588
Sep15	2.0095	0.0141662
Rufy2	4.70807	0.0111968
Zfp874b	3.32711	0.0143375
Prkar2b	4.00073	0.014364
Serp1	2.5399	0.0118802
Cnot2	2.81244	0.0140327
Zscan29	2.82401	0.0144374
Fam193b	4.69254	0.0144549
Akr1e1	1.57317	0.00690969
Clasrp	2.42273	0.00595312
Ap4b1	3.44415	0.00489581
Ivns1abp	2.82731	0.0122383
Zfp81	2.87282	0.0125879
A230046K03Rik	4.10207	0.0463156
Nup160	3.53041	0.0141296
Zswim6	3.91477	0.0142883
Gorasp2	1.8601	0.00989512
5830417I10Rik	2.81662	0.0147488
Wdr46	2.95421	0.0344389
Srcap (7 127559385..127565266)	2.73479	0.0146089
Tbk1	4.01317	0.0147844
Zfp330	3.05025	0.00564119
Zfc3h1	3.61753	0.00969162
Ino80c	1.76119	0.0081341
Pum2	2.29448	0.0145323
Hcfc1	2.90016	0.0149457
Gm9531	-4.748	0.00966695
Pnn	1.99784	0.00743728
Ciz1	3.53353	0.0153844
Tti1	7.63302	0.00715565
Xcl1	-4.70853	0.0263453
Arhgef1	2.63341	0.0152115
Rnpc3	3.74189	0.00105206
Armcx1	7.20047	0.0320972
Zfr	2.86625	0.0151547
Gm21989	1.79769e+308	0.00233383
2510003E04Rik	2.90491	0.00474596
Rdh12	9.5744	0.0416582
Gramd1a	2.84	0.0404784
Pgm3	1.66037	0.0155816
Lsm14a	2.70599	0.0069308
Mcmbp	2.65467	0.00875252
Itgav	2.10921	0.0159905
Zfp472	2.44421	0.0124287
Gm3839 (14 11280734..11356726)	-3.09449	0.0300646
Mga	3.38212	0.0162241
Lin7c	2.70558	0.0126069
Hcn2	2.23346	0.00501186
Golph3	2.21675	0.0163287
Zfp451	2.82286	0.0168145
Vta1	1.60848	0.00511521
Ect2	3.61514	0.0462779
Ufm1	1.70377	0.00705226
Taf13	2.51368	0.0165449
Zc3h7b	2.37769	0.0134958
Spred2	3.63549	0.0158893
Gtf2b	2.05722	0.006068
Cdkn2aip	3.49655	0.0162291
Grina	2.58612	0.00497012
Cnot7	3.03172	0.0140759
Arl6ip6	4.07084	0.0116016
Gm20547	1.79769e+308	0.0418421
2900002K06Rik	6.35778	0.047437
Lin37	2.12852	0.0169652
Sltm	2.41915	0.0454624
Asxl2	3.76277	0.0169433
Slc9a5	5.12776	0.0066202
Tanc1	2.46878	0.017197
Nhsl1	3.65203	0.0172353
Slx1b	5.0993	0.016694
Wdr3	2.9958	0.00502113
Lnp	2.10405	0.0146756
Mxd1	3.67163	0.00540042
Rasgrp3	3.00368	0.00558463
Zfp7	2.99618	0.0131706
Rps3a2	6.41722	0.0130787
Mars	1.65028	0.00772788
Nid1	3.35954	0.0175609
Eif4g2	2.1997	0.00680294
1700020I14Rik	3.81478	0.0171439
Ddx11	3.36959	0.00710023
Fam151b	2.72954	0.0159329
Cd302	2.59292	0.00597733
Ccrn4l	2.16278	0.0180151
Greb1l	2.78778	0.0180127
Stat5b	2.89578	0.017631
Vezt	2.8086	0.00578943
Amd1	2.27151	0.0180226
Ramp2	2.32224	0.0154014
Rbm33	3.4903	0.0182829
3110057O12Rik	4.04735	0.0166467
Sec63	2.8729	0.0184567
Mex3a	3.22526	0.0138121
Pgap1	3.13485	0.0179576
Ythdf3	3.50457	0.0186429
D3Ertd254e	2.42877	0.0171033
Trim7	3.0047	0.0187022
Birc3	2.36212	0.0190246
Zfp71-rs1	3.45518	0.0190863
Vps72	1.93961	0.0190018
Fam126b	2.05154	0.0182729
Gm26529	1.79769e+308	0.0363745
Parp2	3.68738	0.0189286
Osbpl1a	2.77441	0.0133868
Cobll1	3.52845	0.0192435
Syt15	1.79769e+308	0.00993633
Sipa1l3	2.41915	0.019458
Dnajc10	2.34981	0.00588212
Gjc2	1.79769e+308	0.0265036
Atg16l2	2.99684	0.0196715
Dstn	2.17779	0.00598545
AW146154	2.63777	0.0194667
Nrbp2	3.41013	0.0197697
Cabin1	2.48072	0.0156063
Zdhhc17	4.6433	0.0196779
Sppl2a	2.9151	0.0153613
Asprv1	2.20956	0.0199471
Srpk2	2.66637	0.00970735
Plk4	3.59437	0.0197879
Nampt	2.435	0.010816
Ogt	4.17616	0.0199126
Sox5	10.6712	0.0349297
Mtbp	2.95214	0.0201099
Setx	2.25777	0.0202634
Herpud1	2.03308	0.0202742
Zfp229	2.07803	0.0203675
Smim15	4.21115	0.00884897
Atf1	2.34341	0.0120503
Kif17	-3.80086	0.0433575
Sirt1	3.6331	0.0184888
Gxylt1	2.20117	0.0101455
Lats1	2.66791	0.020514
Paxbp1	3.82783	0.00938791
Tmem55a	2.95893	0.00779211
Uck1	1.91016	0.015033
Stk11	2.51959	0.0153661
Hmg20a	2.44664	0.0202881
Stx4a	1.79654	0.0151161
Smarcc2	2.85385	0.0204866
D330020A13Rik	-6.70463	0.0116775
Sc5d	3.96021	0.00811882
Hsf2	2.59585	0.019499
Lss	3.10042	0.0127334
Mis18a	2.2204	0.0119062
Top2b	3.42684	0.0205471
Insr	3.11292	0.0157277
Srsf6	2.71994	0.00823602
Suco	2.66595	0.0208957
Parva	2.32325	0.021094
Blm	2.89388	0.0212006
Rnf114	2.63412	0.0068281
Adamts7	3.04705	0.0212403
Dnajb12	2.62011	0.0178143
Mical1	4.26359	0.0433038
Capza1	2.28061	0.0213645
Ypel3	2.16247	0.00672729
Adal	4.18436	0.0106732
Tle6	2.87636	0.0084712
Baz2a	3.42072	0.0215333
Fam73b	2.16865	0.0213991
Peli1	1.76153	0.0145719
Nudt17	4.02524	0.021478
Ccdc104	2.40361	0.021401
Gpt	2.28105	0.0215453
Zbtb10	3.18899	0.0145366
Gtf2h1	2.80309	0.0216003
Nisch	2.98871	0.0216953
Dhx36	3.44413	0.0217203
Wdr45	1.90311	0.0200722
Tubgcp4	2.84311	0.021776
Ppig	1.84551	0.021768
Serinc1	3.54434	0.0214786
Tmem184c	5.57476	0.0112124
Rsc1a1	-4.54124	0.0259496
Gm26771	-3.8465	0.0206407
Gm16196	1.79769e+308	0.0218842
4732490B19Rik	-8.43787	0.0190928
Efcab11	2.26199	0.0219823
Casp6	1.61174	0.0161223
Arhgap11a	3.81033	0.0220071
BC039771	2.83856	0.0220082
BC005537	2.75838	0.0204886
Tsc1	2.53653	0.0220395
Rpap1	2.88957	0.022199
D930048N14Rik	4.37788	0.0190334
Epm2aip1	3.72675	0.0222526
Ercc6	3.00381	0.0222294
Wdr76	3.26568	0.0207299
Rbmx2	1.80572	0.0106451
Jtb	2.75653	0.0223896
Ticrr	3.45703	0.0154994
Zzz3	3.50296	0.0224094
E2f8	3.11333	0.0214549
Plscr2	3.75627	0.0199382
Ensa	2.51834	0.0224111
Mis18bp1	2.29775	0.0224498
Mrgbp	2.44796	0.0224258
Mtfr1	2.74978	0.022627
Nfs1	1.84112	0.0166454
Ptprj	2.52526	0.0226411
Sgol2	2.60241	0.0219846
Mboat7	2.95096	0.0163352
R3hdm2	2.90472	0.0221024
Pwwp2a	2.98428	0.0228192
Fancf	3.20575	0.0076901
Rbl1	3.26613	0.00754955
Ikbip	1.8593	0.0222132
Zfp93	3.6078	0.0222039
Zbtb44	3.11402	0.02311
Topbp1	2.96903	0.0112603
Paip1	2.48687	0.00773381
Ncapd3	2.69803	0.00819635
Ms4a4c	8.31561	0.0185722
Ccnl2	3.80343	0.0114958
Nudt13	2.99975	0.0238889
Stx16	3.25542	0.014736
Cdip1	2.02977	0.023967
Slc16a5	1.79769e+308	0.0240047
Gm3978	1.79769e+308	0.0240047
Hist1h4n	-6.21211	0.0165594
Nbr1	3.71043	0.0224609
6330408A02Rik	3.55101	0.0240266
Gm9320	2.32088	0.0239639
Ccdc117	2.73141	0.0238035
Clk3	3.56595	0.0222743
4930422G04Rik	4.14275	0.0217167
Fbxl12	3.4421	0.0203926
Ahctf1	2.57696	0.0236879
Os9	1.84074	0.0245149
Cops2	3.93045	0.0182251
Micu3	3.78649	0.0388736
Cdan1	2.91444	0.0241145
Zfp1	2.98549	0.0175839
Ifnb1	1.79769e+308	0.0248858
Ubr3	2.77837	0.0197471
Fxr1	4.30983	0.0250457
Ssr1	2.22742	0.0164192
Cpeb4	5.37982	0.025129
Spice1	4.11817	0.042887
Gm10615	1.79769e+308	0.025332
Casc4	2.09242	0.0203461
Zfp189	2.88596	0.0214764
Chtop	2.19476	0.0255417
Trim46	2.78739	0.0228912
Slc20a1	3.942	0.0255517
Tcp11l2	4.18468	0.0255847
Gm5148	2.37822	0.00879106
Dna2	2.51963	0.0242327
Cyyr1	4.80896	0.0137784
Polr3e	2.67814	0.0209359
Rnf146	3.099	0.0108375
Gm12655	1.79769e+308	0.015116
4930578C19Rik	1.79769e+308	0.0259353
Zfp354b	1.79769e+308	0.0259353
Tceal1	3.11247	0.0222747
Atp8a1	2.11263	0.0221088
Prpf40b	2.95045	0.0260174
Adam17	2.40123	0.022435
Cep70	5.39749	0.029409
Taf9b	2.00571	0.0260391
Lrif1	5.44895	0.0230525
Maged1	2.095	0.00908767
Tmpo	2.32606	0.0112035
Klhl23	2.70008	0.013103
Lamc1	2.43202	0.0239321
Fnbp1l	4.35955	0.0262759
Mlf1ip	2.86143	0.0216997
Lama5	2.82176	0.026337
Atrx	2.98594	0.0263133
Abi2	2.44855	0.0237963
2700050L05Rik	3.32015	0.0144268
Fam210a	2.56678	0.0263833
Mesdc1	2.0333	0.0266064
Gm15884	28.7763	0.00855824
Hdac4 (1 91928784..91931176)	2.02765	0.0264897
Sptan1	2.77184	0.0267616
Tfap4	1.83863	0.0263363
Ap3d1	2.41802	0.0259326
Rprd2	2.99895	0.0179378
Arl1	2.84244	0.00945824
5830428H23Rik	3.30949	0.0267622
Usp18	6.35622	0.0206683
Cry1	3.76685	0.0271566
4933431E20Rik	3.95437	0.0260066
Naa15	2.66918	0.0272347
Marveld3	5.02787	0.0237057
Vav2	3.31066	0.0272373
Dolpp1	1.98546	0.0272559
Zfp760	3.38079	0.0273796
Copb1	2.92096	0.0220191
Sowahc (10 59221952..59226434)	2.29087	0.0112471
Fbrs	3.66313	0.0276835
Ddx17	2.32982	0.0168439
Zfml	3.11887	0.0238637
Rbm5	2.65953	0.0120915
Tagap1	3.84884	0.0137457
Cept1	3.68775	0.0241735
Adh5	2.44152	0.0240607
Ap5z1	2.48758	0.0273597
Cisd2	2.29217	0.0152828
Dexi	1.72454	0.0232719
Ncaph	3.02481	0.0467748
Vldlr	4.03184	0.0174843
Ifi44	9.56375	0.027865
Akap8	3.30472	0.0240137
Fam126a	1.57761	0.0179943
Ccar1	3.33477	0.0105173
Zranb2	3.25321	0.0284449
Pogz	3.34176	0.0285158
Zfp563	2.67127	0.0433704
Rccd1	2.47549	0.028635
Dclre1b	3.62679	0.0284969
Atp2b1	2.17087	0.0239872
Pknox1	2.15901	0.0285974
Det1	2.93218	0.0255126
Grasp	1.89787	0.0287002
Senp6	2.7451	0.0287554
Sept7	2.2195	0.0168865
D10Wsu102e	2.39244	0.0118351
Dync1i2	2.02818	0.0279658
Zfp120	2.63627	0.0289798
Col4a5	3.10831	0.0114028
Slc25a27	5.38242	0.0205319
9130019O22Rik	2.99582	0.0289921
Fbxo3	2.56775	0.0290715
Dll1	5.3924	0.0269118
Nr4a2	4.22148	0.0289451
Gmeb2	2.50945	0.0291484
Sf3b4	2.2288	0.0287354
Mto1	2.62142	0.0408778
Zmym5	4.86294	0.0293728
Itga6	3.15386	0.0294295
Nfe2l2	2.14796	0.0282477
Jmy	2.95696	0.0292034
Usp45	3.24682	0.0192294
Sema4a	1.4689	0.0222804
Pold3	2.40565	0.028312
9230110C19Rik	3.15873	0.0294368
Dpm1	2.59865	0.0114289
BC002059	8.24732	0.0477943
Mfn1	2.63658	0.0297552
Mzf1	2.58306	0.0296518
Ccnl1	5.40374	0.029833
Tardbp	2.39238	0.0118393
Anapc1	2.55961	0.013059
Herc4	2.51817	0.0246181
Ypel2	2.72436	0.030003
Depdc1a	2.86786	0.0295156
Elac1	2.71189	0.0293072
Fam219b	1.58596	0.0301497
Sars	1.85284	0.0290952
Osbpl2	3.37706	0.0183067
Tceal8	4.12366	0.0154486
Rdx	2.7984	0.0293552
Smo	2.35163	0.0296033
Nup214	2.79524	0.0302505
Irak3	2.5738	0.0292525
Usp33	5.04679	0.0207097
Nfrkb	2.61476	0.0298324
Gabbr1	3.97352	0.0300229
Tmem184a	1.59445	0.0306093
March6	2.45397	0.0306234
4922501C03Rik	5.81758	0.0217436
Lemd3	2.44244	0.0116914
Tdp2	2.68179	0.0138483
Kcnq4	1.78164	0.0245388
Prpf3	2.82835	0.0307561
Pold1	1.78567	0.0295682
Tle4	4.50999	0.0183559
Ryk	2.11046	0.0299107
Ndrg3	2.24627	0.0178341
Pura	2.87473	0.0306009
Ttc30b	2.0508	0.0151305
R3hdm4	1.8375	0.0281574
Slc15a2	2.70253	0.0306698
Casp12	2.48066	0.0115687
Zfyve19	2.30307	0.0309972
Nr2c1	3.44595	0.031092
Sike1	2.12927	0.0251244
9930014A18Rik	7.48638	0.0314371
Zfp639	3.42569	0.0309211
Shcbp1	2.9159	0.0269305
Azi2	2.19107	0.041842
Bclaf1	3.34805	0.0307029
Rap1a	2.5424	0.0313741
Birc2	1.92032	0.0254794
Dctn5	2.73745	0.0315888
Caml	1.95509	0.020759
Med19	2.20996	0.0121654
Wwtr1	3.26291	0.0316777
Zfp661	4.06882	0.0317351
Irs1	2.39215	0.0308924
Ptpn23	2.43261	0.0317775
Gfm1	1.66957	0.0125511
Cdr2l	2.68985	0.0317435
Calcoco1	2.60564	0.0318248
Stard9	3.08034	0.0253255
Atat1	1.95674	0.0318232
Mdc1	2.10425	0.0318632
Laptm4a	1.91336	0.0288418
Mmgt2	1.93058	0.0125685
Wdr70	2.21753	0.0225372
Ahsa2	3.38244	0.0181917
Wdfy1	2.89127	0.0282921
Dusp9	1.5453	0.0121936
Zscan20	1.98428	0.0321721
Lta4h	2.46224	0.0129124
Gm26944	1.79769e+308	0.0322386
Fancm	2.72686	0.0193199
Nup188	2.34525	0.0320214
Ubr1	4.02703	0.0213218
Cand2	2.56219	0.032343
Prdm15	3.40557	0.0300218
Kcnd3	1.79769e+308	0.0347885
Jmjd1c	4.17393	0.0325703
Abce1	2.31634	0.0325502
Bach2	2.75731	0.0273088
Katnbl1	2.57009	0.0316145
Zfp747	3.12454	0.0325193
Eif3j2	2.32022	0.0131497
Adcy4	2.04148	0.024384
Pja1	1.44017	0.0264048
Swt1	3.8171	0.0328088
Suv420h2	2.44218	0.0263121
Npat	2.10413	0.0322752
Itgae	2.37547	0.0227029
Hyal2	1.27088	0.0136003
Ubald1	1.83517	0.0325046
Zufsp	4.15636	0.0329168
Srsf1	2.98405	0.0236123
Gyltl1b	3.11127	0.0332047
Stau1	2.29338	0.0331363
Cnot11	2.09296	0.0272177
Mapk1ip1l	2.35165	0.0309058
Mdk	7.80244	0.0333232
Pcnxl4	2.5038	0.0208292
Oas1b	4.32496	0.0304515
Zbed3	4.63234	0.0251232
Ugt1a9	1.79769e+308	0.00305734
Edem2	1.98336	0.0320479
R3hdm1	3.20215	0.0238615
Unc45a	3.75492	0.0335941
Apmap	1.76697	0.0336043
Tbpl1	1.98132	0.0235893
Cenpj	4.43615	0.0244895
Zbtb32	3.11727	0.0336526
Palmd	1.71593	0.0334312
Ptpra	2.02367	0.0132384
Srsf10	3.16469	0.0301216
Afap1l1	4.07935	0.033774
D930015E06Rik	3.23571	0.0320124
2610318N02Rik	13.0678	0.0483817
Pdcd1lg2	1.79769e+308	0.0338502
Pcmtd2	5.32693	0.0360867
Cnot3	1.99965	0.0322051
Tsc22d2	4.33761	0.0341047
Dmrtc1a	1.79769e+308	0.0341192
Gpatch1	4.25642	0.0330733
Zfp101	5.90921	0.0353962
Zfp160	4.78755	0.0131028
Tmem253	1.79769e+308	0.0341192
Zbtb45	1.9674	0.0303888
Cwc22	2.49977	0.0176046
Smg5	2.53116	0.0341733
Zfp280b	2.66404	0.0337997
Dnajb9	3.5614	0.0342137
Cct8	1.64991	0.0144043
Sirt6	2.38185	0.0291285
Trim59	2.36207	0.0342447
Ahr	2.40152	0.0342921
Rest	2.65619	0.0342101
Haus6	2.44108	0.0336863
Srsf11	3.64439	0.034564
Parp6	2.67823	0.034679
Ltf	-5.10063	0.00876278
Cd9	2.8682	0.0252042
Med7	2.53225	0.0308739
Tiparp	3.29523	0.0368207
1110019D14Rik	1.79769e+308	0.0347885
Apex2	4.17549	0.00814307
Gm9754	-3.58055	0.0393601
Gm20783	3.39446	0.034669
Zfp958	3.51696	0.00709455
Gca	3.80548	0.0414006
Adcy7	4.3009	0.0348018
AI597479	2.08122	0.0258913
Zdhhc13	2.52737	0.0347693
Zfp768	3.5001	0.0246765
Prpf40a	2.30755	0.0229346
2210018M11Rik	2.80078	0.0315674
Phtf2	3.25039	0.0349928
Cpsf4l	4.09304	0.0349781
2310044G17Rik	2.40519	0.0350289
Taok2	3.79407	0.0343746
Cth	3.14401	0.0349261
Ddx26b	5.00803	0.0273078
Cd82	1.93558	0.0350911
Acvr1	3.1436	0.0352348
Nckap1	4.54035	0.0395163
Ckap2l	2.44018	0.0237797
Zfp783	7.12052	0.0196025
Mki67	3.12487	0.0321152
Usp8	2.84022	0.0323585
Zgpat	2.96682	0.0351501
Ythdf1	1.92772	0.0141274
Gm16433	-21.5055	0.001694
Smpd2	2.78007	0.0354586
Zwilch	3.10387	0.0241186
Nosip	1.53584	0.0329525
Prr11	3.65422	0.0327833
Hirip3	2.80643	0.0252096
Ttc21b	3.10879	0.0354349
Rorc	4.00914	0.0350653
Fgd6	4.8816	0.0345633
Zfp868	6.24293	0.0235849
Chka	2.95049	0.0310769
Gdi1	3.04971	0.0357133
Ncoa4	7.54054	0.0439845
Yap1	2.37549	0.0275569
Slc33a1	2.65793	0.0353307
Lrrc40	2.79685	0.0150534
Rnf138	2.36446	0.0493586
Casp8	3.8091	0.02011
Fbxo46	2.63482	0.0363252
Pnck	6.88603	0.0321684
Mccc2	3.0264	0.0336165
BC017158	2.29178	0.0365319
Kdelr1	2.4756	0.0314854
Gm13830	10.1074	0.0319786
Zkscan3	4.1739	0.0362807
Prpf38b	2.79538	0.0366164
Dis3	2.68034	0.0191299
Zfp943	4.36363	0.0324328
Oraov1	1.95913	0.0365753
Zfp94	2.97057	0.0315706
Fut8	3.24963	0.0367907
4632434I11Rik	3.1578	0.0368693
Ncoa6	3.98067	0.0368752
Sirt3	3.53055	0.0213619
Ints3	1.57156	0.0367667
Creb3l2	4.08403	0.0323167
Dnajc28	3.53552	0.0369136
Tnfrsf21	6.649	0.036907
Arhgap19	3.47498	0.0369666
Vps37a	2.08443	0.0369985
Golph3l	4.16528	0.0369349
Gba	2.38246	0.0370157
Zfp790	3.15556	0.037031
Chkb	2.48623	0.0362365
Zfp111	3.19323	0.0371114
Aifm1	2.83621	0.0243107
Ttf2	2.6891	0.0371699
Tpd52l2	1.88658	0.0178557
Appl2	3.73296	0.0371588
Dnttip2	2.95858	0.0362882
Pea15a	2.4267	0.0251618
Arhgef26	3.03827	0.0301839
Ubxn4	2.78691	0.0351611
Fam110c	3.23319	0.0369176
Agps	2.70006	0.0172085
Tmem194	4.72688	0.0372519
5430403G16Rik	1.65864	0.0300945
Ubn2	1.9764	0.0349744
Pank2	2.0098	0.0170559
Rmnd1	2.28197	0.0159276
Msl2	2.15173	0.0375599
Dhcr7	2.70197	0.027341
Phf11d	4.18386	0.0335502
Kdm3a	2.49516	0.0269048
5033417F24Rik	1.79769e+308	0.0479082
Larp4	2.89398	0.029258
Hist1h3c	-10.292	0.023853
Ppm1m	2.66309	0.0376738
Ccdc127	3.00976	0.0379104
Gadd45g	2.01453	0.0371019
Napb	8.34422	0.0171427
Mbd4	2.39622	0.0318323
Nr6a1	3.20331	0.0370015
Prmt6	1.65871	0.0265708
Mettl9	2.17633	0.047615
Fuz	2.70306	0.0346064
Msantd2	4.88689	0.034294
Rab22a	2.63974	0.0379821
AW554918	3.75755	0.038361
Gid4	2.42761	0.0380079
Nit2	2.53059	0.0180138
Unk	2.72182	0.03429
Elavl1	1.51908	0.0214422
Cmpk2	5.51785	0.0385676
Pnp	2.10272	0.0306864
2010111I01Rik	2.46629	0.0385844
Zfp933	2.41803	0.0159463
Palm	1.56637	0.0221824
Csde1	2.12837	0.0382026
Ncbp2	2.32345	0.0184154
Crot	2.66111	0.0324093
Nktr	2.79216	0.0264887
Tcf12	3.51425	0.0388524
Ccnd2	1.66462	0.0386271
Strbp	2.82017	0.0361362
Tmem41b	2.41847	0.0332497
Zfp12	2.86791	0.0386122
Gm3650	2.51137	0.0191051
Zfp395	3.22848	0.0343131
Cdc23	3.18508	0.0288185
Hivep3 (4 119733783..120138045)	2.41702	0.0283396
Nab2	2.45363	0.0175256
Mau2	3.02767	0.0342066
Cbx3	2.91577	0.0373395
Zscan26	9.92331	0.016593
Zfp809	2.30637	0.0381314
Ggcx	2.28504	0.0397007
Efna2	2.72974	0.0369424
Tbp	2.46505	0.0398123
Rock1	2.80831	0.0396124
Synj2	2.43398	0.0235469
Ube2a	1.90431	0.0488208
Ube2e3	1.93309	0.0379291
Znrf3	1.88011	0.0246839
Cd93	2.89158	0.0255886
Cd164	2.46689	0.039895
Aes	1.62603	0.026149
Gm20507	2.58952	0.0396312
Phlpp1	2.54628	0.0402651
Hmgcs1	2.45785	0.0403624
U2af1l4	2.02268	0.0401759
BC003331	2.41494	0.0402038
Zfp788	7.56804	0.00083508
Klhdc2	2.03912	0.0402613
Smc4	2.50904	0.0397748
Tbc1d4	2.01208	0.0351195
Ppp1r12c	2.55344	0.0367147
Slc24a5	2.8605	0.0274095
Wdr82	2.65465	0.0346805
Tlcd2	1.99544	0.0340332
Gmpr2	2.40285	0.0231791
Herc1	2.85168	0.0406691
5330430P22Rik	1.79769e+308	0.0121877
Arap3	2.89114	0.0350903
Pibf1	2.80946	0.0407479
Blzf1	3.70005	0.025878
Zfp532	3.26896	0.0406253
Nus1	2.10924	0.0297725
Ube3a	2.21547	0.0177596
Scaf11	2.06041	0.0203656
Atf7 (15 102523842..102625067)	4.36445	0.040931
Inpp4a	2.98899	0.0409999
Pex11a	1.96763	0.0406477
Zfp219	3.29826	0.0285294
Icosl	2.83773	0.0328672
Kdm5a	2.46269	0.0366965
Ankhd1	2.96646	0.0399183
Dock6	1.74315	0.0219362
Ugt1a8	1.79769e+308	0.015573
Zfp207	2.83109	0.0219864
Spdl1	2.12164	0.0245034
Alkbh8	2.26026	0.0412052
Cks1b	1.60385	0.0378611
1600020E01Rik	3.64304	0.0353796
Zfp386	4.72463	0.0413021
Ccpg1	3.84166	0.0416477
Ccnh	1.75357	0.0269368
Rftn1	2.46886	0.0405225
Impad1	2.14643	0.0402111
Zfp568	2.82692	0.0415257
Zfp438	1.78368	0.0392195
Fus	1.90338	0.0179953
Rbm18	2.31005	0.0192633
Csf2ra	4.01855	0.0390538
Xpot	2.61044	0.0418075
Rbm7	2.28871	0.018022
Bdp1	3.66611	0.0420889
P4ha1	1.80689	0.0413313
Dcp1a	4.38446	0.0419608
Ccnk	2.12532	0.018787
Mbd6	3.54988	0.0422475
Srrt	2.31955	0.0181802
Slc30a5	2.8815	0.0423261
Mtdh	2.38702	0.0182294
Gpr160	3.30224	0.0301175
Smarca4	2.15171	0.0331766
Hibadh	1.97994	0.0256807
Ubqln2	1.91829	0.0423592
Cep95	4.93995	0.0422703
Tfdp2	2.86108	0.0425987
Rgcc	2.55244	0.0423337
Cdk8	3.26268	0.0382524
Pgm2l1	1.96712	0.0205081
Elk4	2.23368	0.0425884
Slc4a11	3.92108	0.0341664
Tmem206	2.08675	0.0293716
Galm	3.37933	0.0185032
Gfm2	2.93934	0.0185713
Tkt	2.09739	0.0427443
Mphosph10	2.71096	0.0341657
Pcnt	2.45218	0.0424951
Dhfr	2.0695	0.042183
Osgep	1.7476	0.0406848
Mgea5	2.5928	0.0241801
Tpx2	1.91486	0.0214665
Catsperg1	3.47573	0.0349238
Tor1aip2	2.74663	0.0185976
Hexim1	2.16898	0.0375108
Hspa5	2.62918	0.0338093
Narg2	2.48422	0.042763
Gm17259	3.81661	0.0240641
Surf6	3.1565	0.0339334
Zfp60	2.82759	0.0430583
Rc3h2	2.13804	0.0432163
Zfp367	2.81318	0.0432068
Fbxw2	2.10283	0.0412818
Dqx1	11.0938	0.0377976
Pnpt1	4.52174	0.0209168
Smc6	2.74913	0.0406722
Mia3	2.35321	0.0432603
Uhrf1bp1l	2.46275	0.0434904
Cspp1	3.3264	0.0430699
2610021A01Rik	3.33012	0.0411715
Nsmf	1.57269	0.0422407
Art5	1.79769e+308	0.0148033
Rnft2	4.12716	0.0435024
L3mbtl3	3.01747	0.0440265
Cacna1a	2.36985	0.0228873
Zfp322a	4.36219	0.0340429
Ptprk	2.21315	0.0414137
Tex9	3.42896	0.0435554
Zc3h15	2.81643	0.0423908
Dimt1	3.59965	0.0238539
Nek3	2.74315	0.0439419
Zfp511	2.68658	0.0321462
Morf4l2	2.28096	0.0319053
Atp2c1	2.53874	0.0418588
Zfp605	1.85603	0.0400118
Gm10778	1.79769e+308	0.0337046
Dusp13	1.79769e+308	0.0442811
Gm16046	1.79769e+308	0.0338502
5830418K08Rik	2.98794	0.0442832
Mcts1	1.52192	0.0363507
Med6	1.44263	0.0439483
Mrpl39	1.95381	0.0330553
Wapal	2.57683	0.0209387
Matr3	2.32582	0.0373924
Rgl3	2.00936	0.0375403
Nlgn2	2.90641	0.0445445
Atf7ip (6 136608858..136610870)	2.15473	0.0197683
9530080O11Rik	1.79769e+308	0.0363745
Rbm25	2.09639	0.0443959
Nprl2	1.81081	0.0440335
Cd46	1.79769e+308	0.0377621
Tmem123	2.95485	0.0380594
BC029722	1.79281	0.0241962
1600016N20Rik	7.7795	0.0311454
Rsrc2	3.06427	0.0442642
Supt7l	2.93832	0.025795
Cyp4f13	1.74815	0.0203264
Rnf167	2.61083	0.0419816
Zfp410	2.23394	0.0449428
Slc35b3	1.98831	0.0434607
Tmem161b	4.75784	0.0448904
Arid5a	1.51307	0.0331191
Arcn1	2.66164	0.0331061
Med23	3.11139	0.0336401
Mcoln3	2.74411	0.0449211
Kri1	2.50713	0.0453439
Ddhd1	2.85531	0.0449045
Bzw1	2.95442	0.0441679
Actr8	1.67218	0.0452991
Fam35a	2.41693	0.0280812
Mynn	2.36139	0.0455264
Zfp180	2.31423	0.0456407
Slc12a2	2.15329	0.0419146
Zfp770	3.1331	0.0457324
Dhx34	2.00036	0.045767
Ranbp2	3.11619	0.0458328
Golga7	1.66578	0.0459289
Txndc5	3.18447	0.0432098
Smek1	2.01355	0.0459662
Nfxl1	3.18227	0.0431863
Luc7l3	2.76628	0.02588
Tmc4	5.12144	0.0459297
Crem	2.35008	0.0441222
Btg1	1.87864	0.0417503
Ep300	2.82846	0.020898
Chek2	2.57446	0.0456468
Khnyn	3.09838	0.0461554
Tob2 (15 81848269..81858326)	3.4396	0.0461569
Hps5	3.56572	0.0461605
Nusap1	2.16854	0.0438753
Gm14085	1.79769e+308	0.0462701
Rab14	2.19433	0.0284057
E4f1	1.39976	0.0436567
Fam103a1	2.25601	0.0376825
Pdzd3	1.79769e+308	0.015092
Zfp579	4.34614	0.0459476
Ube2d3	2.12061	0.0427333
Asph	2.85853	0.0446526
Fam73a	2.75649	0.046459
Parg	2.61365	0.0426356
Creb1	3.28269	0.0456351
Rbm12b1	4.04554	0.0219543
0610031J06Rik	2.03087	0.046507
Fam168a	4.1334	0.0465713
Fam21	3.01089	0.0404964
Scai	4.34391	0.0463629
Mfsd7a	1.85905	0.0465835
Hcfc2	2.33979	0.0465798
Tox4	1.88193	0.0385842
Tyro3	2.58534	0.0467036
Cherp	2.9603	0.0467107
2700089E24Rik	1.95264	0.0308505
Npas1	1.79769e+308	0.0462704
Irf9	2.68658	0.0222729
Txlng	2.40142	0.0463181
Tpp2	2.88358	0.0428761
Ppp1r15b	2.53546	0.0388464
Zfp40	4.72677	0.0470315
Rffl	4.34367	0.0466529
4632428N05Rik	1.49363	0.0464111
Ctcf	2.63581	0.0470202
Cetn3	2.32619	0.0228484
Ncoa1	3.24642	0.047238
Brcc3	2.14773	0.04642
Gstcd	2.35654	0.0214386
Odf2l	8.36411	0.0380464
Wdr86	1.79769e+308	0.0237327
Fem1c	2.62335	0.0472568
Zc3h8	2.3806	0.0295294
Rbmx	3.74081	0.0400706
Dnajc5	2.88577	0.0474304
Ltv1	2.22943	0.0227522
Brd1	2.88353	0.0476949
Hnrnpk	2.15314	0.042287
Ola1	1.86946	0.0216345
Hdac2	2.35344	0.0442217
Terf1	2.33126	0.0318347
Bag5	2.54893	0.029266
Iws1	2.44861	0.0394763
Sdpr	2.53746	0.0478183
Lacc1	4.3008	0.0478203
Agap1	2.42541	0.0463618
Cry2	2.80136	0.0478847
Gstm2	7.33147	0.0310123
St6galnac2	3.77847	0.0340751
2410089E03Rik	2.25239	0.047995
Thoc2	3.5255	0.048045
Ticam2	6.0169	0.0445448
Foxd2	1.92045	0.0480607
Surf4	2.07788	0.0240189
Pydc4	1.79769e+308	0.0481362
Rap1b	2.27659	0.0406748
Tead1	3.20335	0.04734
Dip2b	1.95935	0.0476113
C030039L03Rik	3.77145	0.0436293
Cul5	2.41672	0.044532
Trmt10c	2.67051	0.047776
Utp6	2.39933	0.0221295
Cdkal1	3.06672	0.047995
Hk1	3.28056	0.048433
Gabarapl1	2.69448	0.047476
Srr	4.06986	0.0469775
Madd	2.56904	0.0467641
Rprd1a	1.9969	0.0222571
Midn	2.26827	0.0486053
Zfp39	2.80719	0.0468163
Lmf2	1.63388	0.0251577
Fubp1	4.05137	0.0486894
Vps16	2.22159	0.0260878
Rbbp9	3.80318	0.0488076
Cbx5	2.09804	0.0243747
Cep170	5.3894	0.0356809
Sowahc (10 59221952..59226431)	2.64398	0.0485071
Osgepl1	4.22665	0.0442056
B230322F03Rik	1.79769e+308	0.0489743
Gas2l3	2.49146	0.0489689
Rbm38	2.45705	0.023661
Vps26a	3.4911	0.0483878
Lgals9	3.97487	0.0462575
Gpr125	1.87853	0.0488291
Mtmr1	3.91162	0.0485241
Slfn8	4.31192	0.0492532
2810021J22Rik	4.19589	0.0482057
Mdm2	2.67271	0.0403321
D3Ertd751e	3.69726	0.0494865
Gm26917	-16.2564	0.00352413
Wdr77	2.01881	0.0495214
Cir1	2.62572	0.0455936
Mroh2a	4.22097	0.029054
Eri2	2.61278	0.0281175
Ccdc41	2.70643	0.049374
Isg20	3.22449	0.0495522
Yae1d1	2.28582	0.0496118
Fpgt	5.13439	0.0145839
Tvp23b	2.14155	0.0297572
Zfp217	2.7508	0.0498119
Zbtb40	2.29425	0.034869
Gm26670	-4.47063	0.0225203
Lekr1	2.71306	0.0497584
Coq10a	2.90228	0.0478583
Kansl3	3.95779	0.0491437
Ctnnbl1	2.17191	0.0420268
Pmm2	2.50493	0.0387262
Rtel1	2.25691	0.0493426
Ercc5	2.24639	0.0449508
Ctnna1	2.86845	0.0466339
Sec23ip	2.20315	0.0404677
Zfp28	2.88032	0.0364773
Pex13	2.36265	0.0352253
Trnp1	1.79769e+308	0.0195452
Asb7	3.73532	0.0489339
Ahcyl2	2.86275	0.0483121
Sept2	2.65582	0.0336292
Atxn7l2	2.37623	0.0432737
Vapb	2.28705	0.0390211
Ambra1	3.60466	0.0486644
Mettl17	3.17586	0.0499117
Vcpip1	2.83414	0.0449024
Ccnyl1	3.32736	0.0451838
Kat6b	3.36226	0.032551
Ralgapa2	2.42825	0.0477148
Rnf170	2.56349	0.0324788
Ipo11	2.74105	0.0481869
Uba3	2.82258	0.0242211
Stim2	2.02048	0.0243047
Dnajc14	2.10854	0.0435871
Zcchc9	3.23985	0.0396675
Rfesd	1.7328	0.0340171
Pnrc2	2.29223	0.0481408
Ushbp1	2.64549	0.0270086
Zfp947	1.75813	0.0364883
Copa	2.26122	0.0272661
Cenpk	2.56663	0.0381353
Eif2ak2	2.8109	0.034833
Cdc73 (1 143598796..143702893)	2.82199	0.0446361
Cstf1	2.26475	0.047914
Aurkb	2.51782	0.0259975
Aga	2.1287	0.0429336
Rhoj	1.64456	0.029589
Timm21	4.72472	0.0258772
Tube1	4.81409	0.0308833
Prkab2	21.1773	0.0211779
Bcl10	2.17474	0.0373956
Psma1	2.55717	0.046742
Zfp952	2.34742	0.0437529
Msto1	2.02443	0.0476766
Mocs2	2.27477	0.0476663
Nsmce2	1.29914	0.0404265
Lig1	1.40049	0.0345875
Zbtb48	2.04259	0.0417135
Npepl1	1.76168	0.0313566
Neto2	1.95825	0.0460542
Tpr	2.39256	0.0463996
Smarca5	2.14043	0.0359074
Pphln1	2.20214	0.0348722
AU022252	1.26209	0.0470059
B430212C06Rik	1.62648	0.0258801
Pcdhga9	1.95612	0.0487307
Ptgfrn	2.56811	0.0289411
Zfp473	2.7145	0.0399331
Ypel5	1.50644	0.0312853
Arl14ep	2.37253	0.0264891
Ccdc77	3.16228	0.0486145
Tmed7	2.49546	0.0376995
Pcnp	2.6561	0.0309467
1700123K08Rik	1.79769e+308	0.00255477
Mum1	2.27475	0.0300261
Mcu	2.30225	0.0447988
Ttc30a1	3.93913	0.0395499
Pcid2	1.71167	0.0314888
Oas1g	3.94513	0.0476363
Nup107	2.329	0.0312932
Ccdc88a	2.93721	0.0315771
Dars	2.97842	0.0361457
Wdr5	2.13594	0.0308357
Ireb2	2.88477	0.0452276
Gm14326	1.79769e+308	0.00289538
Abcb7	2.76808	0.03696
Trmt10a	2.55705	0.0470347
Telo2	1.81187	0.044595
Stam2	3.00694	0.0434907
Bcl2l12	1.60316	0.0493626
Poc1b	2.33611	0.0414813
1700066M21Rik	2.99787	0.0373898
Scyl2	2.13194	0.0421059
Wdr48	4.69231	0.0440192
Zfp62	4.12848	0.0177653
Ddb2	2.91882	0.0336648
Haus5	3.26008	0.0289582
Hist1h3h	-5.37655	0.0162313
Tdrp	2.28967	0.0458223
Fah	3.28974	0.0348619
Zfp764	5.01823	0.000710546
Pcna	2.01962	0.0345525
Snrnp200	2.57636	0.0421835
Rbm47	1.72414	0.0353172
Sass6	2.31184	0.0339619
Fam118a	2.652	0.0332829
Fmnl3	1.99648	0.0323042
Blcap	2.58613	0.0380894
Cep44	2.4876	0.0459543
Ybx2	4.57667	0.0444368
Uba5	1.35483	0.0319182
Mgme1	3.00526	0.0493543
Zbtb34	2.61987	0.0441893
Mterfd1	1.99824	0.0322357
AI597468	2.0844	0.0318271
Smg7	1.81449	0.0479753
Ppp6c	1.53435	0.0396792
Reps1	2.99432	0.0409214
Csnk2a1	1.85944	0.0464588
Xrcc4	3.16311	0.0406299
Sft2d1	2.16854	0.0451534
Wdr83	1.79349	0.0363927
Dsn1	2.86362	0.0309596
Gcnt1	3.32076	0.0427317
Vipr1	4.64005	0.0371988
Car14	5.37531	0.0429957
Stard7	2.17262	0.0435119
Spns1	2.02714	0.0321243
Mllt11	2.29807	0.0450385
Kctd12b	13.802	0.0258822
Pcf11	3.62633	0.0377592
Rsg1	1.79769e+308	0.0128732
Tmem204	2.40382	0.0423402
Cmpk1	1.98749	0.0329178
Polr3a	2.70057	0.0340933
Toe1	2.57039	0.0426893
Bag6	1.65843	0.0464769
Riok1	2.21942	0.0390531
9530051G07Rik	1.79769e+308	0.0154285
A630052C17Rik	1.79769e+308	0.0372043
Stk3	2.42836	0.0347619
Gdi2	1.97391	0.0440716
Supv3l1	2.27846	0.0386286
Gtpbp4	2.32208	0.0420533
Wtip	1.95741	0.0469827
Sec11a	2.3913	0.0390338
2410018M08Rik	2.21146	0.036938
Csnk1e	1.85939	0.0359651
Mapk8ip3	2.88708	0.0447916
Ssfa2	2.39899	0.034259
Kifc5b	1.84159	0.0356163
Mbd5	2.81556	0.0455475
Tars2	1.94643	0.0350775
Cbll1	3.06034	0.0383065
Kansl1l	6.93006	0.0292874
Sdhc	2.28825	0.0440709
Lrdd	5.52044	0.00647068
Rfng	2.07047	0.0402198
Top1	3.94588	0.0335701
Elp4	2.97691	0.0394729
Lrrc51	5.90449	0.00842055
Gnas	4.97437	0.0475636
Smad4	2.1612	0.0464505
Prdm10	1.98987	0.0363102
Gmnn	2.08863	0.0430629
Tax1bp1	2.59456	0.0491585
Gm12953	-16.5729	0.0203595
Acadsb	6.92972	0.0456473
Esco1	2.23823	0.0399923
Gm9726	1.37756	0.0401744
Dgat2	5.31534	0.0109425
Pald1	1.53344	0.037826
Zfp457	1.79769e+308	0.00145899
Ccdc116	1.79769e+308	0.0424966
Celf1	2.35975	0.0401489
Gm12258	5.95542	0.0463987
Rabep2	1.94186	0.0383108
Arhgap18	2.43662	0.0392424
Ddx46	2.26018	0.0470728
Fbxo8	2.01481	0.0382453
Bbs4	3.71928	0.0456166
1810019D21Rik	7.66092	0.0236481
Dpy19l1	3.41397	0.00422121
Fndc3b	3.81216	0.0191677
Acmsd	-4.0679	0.0490477
F3	6.91706	0.0176219
Tmem39a	3.06245	0.0414447
Jrkl	5.9734	0.022316
Rab25	1.24908	0.0489073
Gm13066	-3.23036	0.0211535
Pcbp2	2.37306	0.0400023
4930503L19Rik	16.1165	0.013155
Gm5141	8.92573	0.0157276
Rdh13	2.69994	0.0432273
Trappc6b	3.02091	0.0428511
Gmfb	2.56728	0.0434621
Dcbld1	2.11928	0.0469716
Tsen54	1.89941	0.0439486
Ankrd10	4.17041	0.0499087
Larp7	3.45345	0.0431283
Ubl4	1.66764	0.0447721
Gm14325	5.20868	0.0274157
Ddx27	1.98902	0.0466605
Nlrc5	2.74965	0.049996
Bace1	2.60088	0.0448871
Ppwd1	4.70214	0.00914789
Bcar3	2.29003	0.0436764
Tbc1d15	2.35275	0.0455301
Hsbp1	1.53812	0.0444848
Zfp507	4.82732	0.0485373
Tmem183a	1.87135	0.0428363
Rab6a	2.39763	0.0479752
Gm10311	1.79769e+308	0.00613054
Tyw5	2.21091	0.0485264
Creld1	2.56546	0.0451479
Acad8	2.04375	0.0448402
Dgka	9.15155	0.0449385
Nemf	3.11114	0.0449579
Xpa	1.58781	0.0488552
Zfp27	4.72909	0.00944001
Pld3	1.72173	0.0498847
Gm13421	1.79769e+308	0.0359525
Wisp3	1.79769e+308	0.0474611
Mtf2	2.37654	0.0489954
Slc35e2	3.3997	0.0472815
Lgals4	6.14665	0.0115676
Cyp27a1	20.6149	0.0226349
Tmem135	2.37378	0.0459942
BC025920	1.79769e+308	0.0437314
Rad17	3.14167	0.0480371
Cux2 (5 121858386..122050102)	1.79769e+308	0.00476118
Ppp4r2	1.98844	0.0486024
Palb2	4.42967	0.0362333
Nol8	4.1303	0.028604
Syt5	8.25394	0.0209151
Isyna1	2.50896	0.0497549
Klf10	2.33511	0.0230573
Krr1	2.60872	0.0477755
Gp1bb	1.30171	0.0482342
A230072C01Rik	6.16143	0.0341154
Tor1a	1.71483	0.0482773
0610012G03Rik	2.35306	0.0485399
Nup88	2.12427	0.0494278
Picalm	4.37687	0.0332066
Arsk	5.34432	0.0217872
Ptpn2	2.09432	0.0499405
4831440E17Rik	-12.6568	0.0106898
BC030336	3.47659	0.0240512
Trim36	4.24385	0.0155022
Gm4755	1.79769e+308	0.0154285
Zfp260	4.31923	0.0154841
3110002H16Rik	3.3539	0.0244908
Gm8225	-3.51474	0.0296064
Trmt13	5.4895	0.049592
Tubgcp5	4.14442	0.0264622
Chrdl2	1.79769e+308	0.0448875
Rmi1	4.99958	0.0156471
Dact3	7.23862	0.0352395
Ccdc17	10.2672	0.0480118
Ginm1	5.27591	0.0177988
Gm5665	8.43895	0.00772541
Mettl15	5.17354	0.0431964
PLA2G4B	10.2151	0.0468782
Kcnip3	10.7325	0.047669
Zfp959	5.14946	0.0171259
Zfp280d	8.79376	0.0221068
Slc38a2	3.25836	0.0161293
Gm26566	1.79769e+308	0.0289269
Aplp1	4.45999	0.0172322
Taf7	4.31875	0.0150079
Fmnl2	4.30908	0.0253268
Pcdhb10	1.79769e+308	0.0240047
B3gnt6	1.79769e+308	0.0266733
Tmem198	1.79769e+308	0.0396672
Spata2l	10.4555	0.0237448
Ap5m1	5.01081	0.0404761
Zfp110	3.74826	0.0014566
Jam3	12.558	0.0455401
Trp53cor1	-5.42694	0.0210942
Inca1	7.03642	0.0466144
Sgk1	3.69829	0.0453601
Arrdc2	5.73111	0.00472702
9330151L19Rik	9.1678	0.0450595
Srfbp1	3.41048	0.0111334
Lrrc39	4.34277	0.0384065
Pggt1b	2.99884	0.0160947
Eme2	5.56371	0.0355664
Asb10	1.79769e+308	0.0442811
Kcp	1.79769e+308	0.0240047
Mettl7a1	3.74488	0.0456901
Rcn3	2.96958	0.0354002
Zfp266	4.5577	0.021739
Dmxl1	3.56545	0.0394154
Ap3s1	3.27597	0.00860375
Rgs4	9.68952	0.0457581
Dhrs9	16.6751	0.0327124
Gm15929	1.79769e+308	0.0366327
Dnajc6	1.79769e+308	0.0145616
Dmpk	8.07531	0.0325525
Camkmt	3.40981	0.036694
Slc39a2	1.79769e+308	0.0335664
Gm13610	1.79769e+308	0.0259353
Zfp329	6.36288	0.00337347
Leprel2	5.4035	0.016321
Zfp493	7.40456	0.019697
Edil3	14.9163	0.030978
8430427H17Rik	6.04058	0.00703753
Zfp553	4.8232	0.0155251
Gm2237	1.79769e+308	0.00964184
Spink10	1.79769e+308	0.0363745
Zfp397	4.95344	0.00566364
A430105J06Rik	1.79769e+308	0.0134712
Palm3	1.79769e+308	0.0259353
Nfkbiz	3.6087	0.0485309
Gm10474	8.31732	0.0107019
Larp1b (3 41021938..41040234)	6.98459	0.0340789
4632404H12Rik	7.16749	0.0157655
3300005D01Rik	1.79769e+308	0.0414398
Sgca	1.79769e+308	0.0359598
Tshz3	5.28882	0.0491377
Tro	1.79769e+308	0.0389503
1500026H17Rik	1.79769e+308	0.0474611
Zfp697	4.7807	0.00621224
9330160F10Rik	6.2814	0.0271944
Ednrb	2.97258	0.00871313
Slc2a4rg-ps	10.8449	0.00445611
Sox18	3.6473	0.0161586
Kcnt1	1.79769e+308	0.0482211
RP24-390G17.1	7.97359	0.0374813
Ccdc112	3.14896	0.0340343
Kiss1r	1.79769e+308	0.0346604
Wnt7a	1.79769e+308	0.0402202
1700056N10Rik	1.79769e+308	0.0156234
Mesp1	7.00757	0.0194746
Tmtc3	3.74749	0.0336234
Ccdc79	10.8874	0.0490059
Zfp618	7.06146	0.0254508
Cort	1.79769e+308	0.00406463
Zfp808	9.78981	0.0358538
Zfp820	7.49082	0.0184949
Taf4b	3.20656	0.0158847
Ankrd23	10.7545	0.0432513
Igdcc4	1.79769e+308	0.0261437
Clca5	15.5216	0.0213534
Tshz1	4.24486	0.0153424
Gm16586	18.7516	0.0497986
Aldh3b2	1.79769e+308	0.0336501
Adam21	1.79769e+308	0.0218842
Gm15697	1.79769e+308	0.0218842
Gm15690	1.79769e+308	0.0304487
Ecm2	1.79769e+308	0.0442811
C130060C02Rik	1.79769e+308	0.0217471
Cdh5	2.1892	0.0439448
Fgf7	1.79769e+308	0.0075594
Egf	1.79769e+308	0.0308434
Gm12905	1.79769e+308	0.00681152
P2rx3	1.79769e+308	0.0177682
Klhl35	1.79769e+308	0.0242447
Psmb11	1.79769e+308	0.0259353
Tfec	1.79769e+308	0.0296945
Heph	1.79769e+308	0.042744
Gm20036	1.79769e+308	0.0341192
9330159M07Rik	1.79769e+308	0.0240047
Slc3a1	7.39806	0.0449398
Ttc18	1.79769e+308	0.0480004
Lefty1	2.3533	0.0146859
Gm2885	1.79769e+308	0.0341192
Axdnd1	1.79769e+308	0.0374846
Zfp418	4.70383	0.00898462
Gal3st2	1.79769e+308	0.0197559
Gm4673	1.79769e+308	0.010583
Stac3	1.79769e+308	0.00947768
Gm8251	1.79769e+308	0.0161274
Nup210l	1.79769e+308	0.0418916
Sema7a	3.11991	0.0399719
Zc3h12d	10.9972	0.028733
Peg10	10.5477	0.0131487
Fetub	2.98223	0.0479716
A230005M16Rik	1.79769e+308	0.0119838
Tfpi2	8.73472	0.0186628
Mx2	15.0662	0.0235539
Rhox5	1.79769e+308	0.0435939
Gm16206	1.79769e+308	0.00398333
I830077J02Rik	1.79769e+308	0.0359443
Zfp758	5.0309	0.0207153
Gm3383	1.79769e+308	0.0392592
Casp4	4.17648	0.0463957
Orm2	1.79769e+308	0.0364777
Acvr1c	1.79769e+308	0.0240047
Fscn3	1.79769e+308	0.0338502
Necab2	1.79769e+308	0.0474611
Gm26799	1.79769e+308	0.0359598
Gm9933	1.79769e+308	0.0494967
Gm16493	1.79769e+308	0.0347885
Rasgef1c	1.79769e+308	0.00242686
5930403N24Rik	1.79769e+308	0.00613054
Gm13563	1.79769e+308	0.0218842
Zfp953	1.79769e+308	0.0397963
5430400D12Rik	1.79769e+308	0.0347885
Aldh1a2	11.1347	0.00453081
Gm2974	1.79769e+308	0.0308434
Hipk4	8.83542	0.00942436
Pyhin1	12.7197	0.0265476
Aard	1.79769e+308	0.0240047
Serpina3e-ps	1.79769e+308	0.0341192
Kcnip4	1.79769e+308	0.00610999
P4ha3	7.64707	0.0232453
Steap2	5.7664	0.0405557
Mybph	1.79769e+308	0.00613054
Gm9922	1.79769e+308	0.0201621
Gm14023	1.79769e+308	0.0338502
Tmem30c	1.79769e+308	0.0364945
Olfr558	1.79769e+308	0.0168866
Nxnl2	1.79769e+308	0.0168866
Gm26649	1.79769e+308	0.0454618
Sh2d4b	1.79769e+308	0.0396297
Clstn2	1.79769e+308	0.0282903
Dppa3	1.79769e+308	0.0341192
Coro6	23.5206	0.0169589
Creb3l1	4.41491	0.0080889
Rgs9bp	1.79769e+308	0.00923672
Ccdc67	1.79769e+308	0.0202116
C130046K22Rik	1.79769e+308	0.00242686
Prdm8	1.79769e+308	0.0122467
Hpcal4	1.79769e+308	0.00406463
Scn2a1	1.79769e+308	0.0363745
Gm8619	1.79769e+308	0.0452824
Tmsb15l	6.54128	0.0153777
Gm9982	1.79769e+308	0.00663997
Pou1f1	1.79769e+308	0.00681152
3110021A11Rik	1.79769e+308	0.0137055
Gm15234	1.79769e+308	0.0168866
Npy1r	1.79769e+308	0.0168866
Gm20662	1.79769e+308	0.0168866
Il27	1.79769e+308	0.0201621
L1td1	1.79769e+308	0.0218842
Dusp15	1.79769e+308	0.0218842
Zan	1.79769e+308	0.0232775
Gm13935	1.79769e+308	0.0240047
Gm12279	1.79769e+308	0.0240047
Trim10	1.79769e+308	0.0248858
Gm17281	1.79769e+308	0.0248858
C230062I16Rik	1.79769e+308	0.0338502
AW047730	1.79769e+308	0.0338502
Gm14102	1.79769e+308	0.0341192
Tal2	1.79769e+308	0.0341192
Sh2d6	1.79769e+308	0.0347885
6530402F18Rik	1.79769e+308	0.0347885
Gm11581	1.79769e+308	0.0347885
Gm5468	1.79769e+308	0.0347885
Gm4211	1.79769e+308	0.0363745
Adcyap1r1	1.79769e+308	0.0448875
Gm14122	1.79769e+308	0.046723
Alpk3	1.79769e+308	0.0494967
Bicc1	6.42458	0.0034897
Rps12-ps3	-3.56113	0.0438864
Gm17041	-2.39902	0.0316723
BC023719	-2.55995	0.0276407
Gfi1b	-2.26923	0.0477562
Gm16062	-2.00224	0.0277738
Bean1	-3.99971	0.0354493
Paqr5	-3.99971	0.0354493
Gm10567	-3.83278	0.026196
Hist1h2bf	-5.06951	0.0378808
Mroh4	-2.89097	0.0283579
Ctf2	-3.64795	0.0274724
Gal3st4	-5.45618	0.0464126
Crip1	-2.0843	0.0477731
Gm14207	-3.3282	0.0196354
Gm9803	-5.50452	0.0198117
Hist1h2ad	-5.5218	0.0195691
Srp54a	-1.86386	0.0377621
Gm8325	-2.53282	0.0260383
Gm10184	-2.66944	0.0352086
Gm8871	-5.90806	0.0323826
Gm10123	-4.07525	0.0175641
Hist1h2ac	-2.05374	0.0306305
Kcnh2	-1.59639	0.0296502
Gm20481	-6.12162	0.0129427
Syce1l	-6.41527	0.0127159
Gm26723	-6.41527	0.0127159
Hist1h4b	-4.23591	0.0283909
Mylpf	-1.56201	0.0252095
Chchd2	-2.00325	0.025639
Samd12	-4.07683	0.026404
Gm20671	-8.44416	0.0325488
2310039H08Rik	-4.98722	0.0206086
Gm26716	-5.37882	0.0165419
Hist1h3e	-6.03833	0.00640092
Hist1h2bp	-2.73435	0.0135502
Gm11423	-2.66052	0.00251287
Gm5884	-2.6702	0.00370677
E130218I03Rik	-5.71007	0.00633088
RNF8	-1.96165	0.00838891
Gm21983	-2.63843	0.00787797
Glrx5	-2.36863	0.0430459
Gm10108	-3.15639	0.00211201
